# Supplementary material
Source: PubMed Central journal article supplement (PMC5210247)
Supplement: HAEMATOL-2016-146076v1-Lopez-Iglesias-01.pdf [file HAEMATOL-2016-146076v1-Lopez-Iglesias-01.pdf]

The triple combination of Zalypsis, bortezomib and dexamethasone triggers cell death, mainly through a synergistic induction of DNA damage and the blockade of NF- $\kappa$ B activation

### Multiple Myeloma treatment

Triple combination

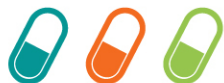

Zalypsis  
Bortezomib  
Dexamethasone

VS

Double combinations

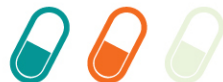

Zalypsis  
Bortezomib  
Dexamethasone

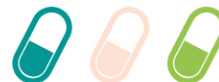

Zalypsis  
Bortezomib  
Dexamethasone

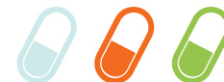

Zalypsis  
Bortezomib  
Dexamethasone

Triple combination

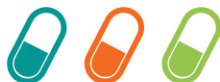

*in vitro*, *ex vivo* and *in vivo* experiments

- strong synergy
- higher efficacy

Trigger of cell death

- blockade of NF- $\kappa$ B activation
- synergistic induction of DNA damage
